1 **Targeted sequence capture of *Orientia tsutsugamushi* DNA from chiggers**  
2 **and humans**

3

4 Ivo Elliott<sup>1,2</sup>, Neeranuch Thangnimitchok<sup>1</sup>, Mariateresa de Cesare<sup>3</sup>, Piyada

5 Linsuwanon<sup>4</sup>, Daniel H. Paris<sup>5,6</sup>, Nicholas PJ Day<sup>2,7</sup>, Paul N. Newton<sup>1,2,7</sup>, Rory

6 Bowden<sup>3</sup>, Elizabeth M. Batty<sup>2,4</sup>

7

8 Affiliations:

9 1. Lao-Oxford-Mahosot Hospital-Wellcome Trust Research Unit, Microbiology

10 Laboratory, Mahosot Hospital, Vientiane, Lao PDR

11 2. Centre for Tropical Medicine and Global Health, Nuffield Department of

12 Medicine, University of Oxford, Oxford, United Kingdom

13 3. Wellcome Centre for Human Genetics, University of Oxford, Oxford, United

14 Kingdom

15 4. Department of Entomology, Armed Forces Research Institute of Medical

16 Sciences, Bangkok, Thailand

17 5. Department of Medicine, Swiss Tropical and Public Health Institute, Basel,

18 Switzerland

19 6. Department of Clinical Research, University of Basel, Basel, Switzerland

20 7. Mahidol-Oxford Tropical Medicine Research Unit, Faculty of Tropical Medicine,

21 Mahidol University, Bangkok, Thailand

22

23 Corresponding author: Ivo Elliott [ivo@tropmedres.ac](mailto:ivo@tropmedres.ac)

24

25 Word count: 5,438

26

## 27 **Abstract**

28 Scrub typhus is a febrile disease caused by *Orientia tsutsugamushi*, transmitted  
29 by larval stage Trombiculid mites (chiggers), whose primary hosts are small  
30 mammals. The phylogenomics of *O. tsutsugamushi* in chiggers, small mammals  
31 and humans remains poorly understood. To combat the limitations imposed by  
32 the low relative quantities of pathogen DNA in typical *O. tsutsugamushi* clinical  
33 and ecological samples, along with the technical, safety and cost limitations of  
34 cell culture, a novel probe-based target enrichment sequencing protocol was  
35 developed. The method was designed to capture variation among conserved  
36 genes and facilitate phylogenomic analysis at the scale of population samples. A  
37 whole-genome amplification step was incorporated to enhance the efficiency of  
38 sequencing by reducing duplication rates. This resulted in on-target capture  
39 rates of up to 93% for a diverse set of human, chigger, and rodent samples, with  
40 the greatest success rate in samples with real-time PCR  $C_t$  values below 35.  
41 Analysis of the best-performing samples revealed phylogeographic clustering at  
42 local, provincial and international scales. Applying the methodology to a  
43 comprehensive set of samples could yield a more complete understanding of the  
44 ecology, genomic evolution and population structure of *O. tsutsugamushi* and  
45 other similarly challenging organisms, with potential benefits in the  
46 development of diagnostic tests and vaccines.

47

## 48 **Introduction**

49 Scrub typhus is a vector-borne zoonotic disease risking life-threatening febrile  
50 infection in humans. The disease is caused by an obligate intracellular Gram-  
51 negative bacterium, *Orientia tsutsugamushi*. Scrub typhus has an expanding

52 known distribution, with most disease occurring across South and East Asia and  
53 parts of the Pacific Rim.

54 The genus *Orientia* is classified in the family Rickettsiaceae, a member of the  
55 order Rickettsiales. Two species of *Orientia* are currently recognised - *O.*  
56 *tsutsugamushi* and *O. chuto*, the latter known solely from a patient infected in the  
57 United Arab Emirates <sup>1</sup>. Recent molecular identification of *O. tsutsugamushi* in  
58 humans in Chile <sup>2</sup> and 16S sequences with close homology to *O. tsutsugamushi* in  
59 dogs in South Africa <sup>3</sup> and small mammals in Senegal and France <sup>4</sup>, and to *O.*  
60 *chuto* in chiggers in Kenya <sup>5</sup>, suggest the possibility of further species and future  
61 taxonomic re-evaluation.

62 Larval trombiculid mites (chiggers) transmit *Orientia* to vertebrates, including  
63 man. The organism appears to be maintained by transovarial (vertical) and  
64 transstadial (between life-stages) transmission in chiggers, suggesting that they  
65 act as both vector and reservoir <sup>6-9</sup>. There is good evidence for the transmission  
66 of *O. tsutsugamushi* to man by at least 10 species of chiggers <sup>10</sup>. The ecology of the  
67 disease and the interaction of *Orientia* between vectors, small mammals and  
68 humans are complex and relatively poorly understood <sup>11</sup>.

69 A high degree of phenotypic and genotypic diversity has been reported in *O.*  
70 *tsutsugamushi*. Several antigenic types appear to be widely present throughout  
71 Southeast Asia, with one (TA716) making up over 70% of isolates from several  
72 countries <sup>12</sup>. More recently, genetic analysis of highly variable single genes for  
73 outer membrane proteins such as the 56kDa and 47kDa antigens or more  
74 conserved genes (e.g. GroEL) have been used to define genotypic variation. A  
75 recent detailed analysis of 56kDa sequences from across South and East Asia  
76 identified at least 17 clusters of genotypes belonging to 5 identifiable groups <sup>13</sup>.

77 Several multi-locus sequence typing (MLST) schemes using sets of housekeeping  
78 genes have been proposed, though no single scheme has been universally  
79 accepted <sup>14-18</sup>. Using one MLST scheme, human isolates from 3 regions of Laos  
80 and an isolate from nearby Udon Thani in Northeast Thailand were compared.  
81 Low levels of population differentiation were reported between geographically  
82 close (Vientiane and Udon Thani) strains, while isolates from southern Laos  
83 formed a distinct population <sup>16</sup>. In that study, 8% of isolates appeared to  
84 represent mixed infection, and in Thailand 25% of infections were reportedly  
85 mixed <sup>18</sup>. Recent whole-genome phylogenetic comparisons between 8 well-  
86 characterised strains revealed relationships that were significantly different  
87 from phylogenies created from single-gene or MLST schemes, illustrating the  
88 increased resolution achievable from whole-genome sequencing <sup>19</sup>. At the level  
89 of individual genes such as 56kDa, enormous genetic variability is seen, while at  
90 the MLST level only a few clonal clusters are evident.

91 Several factors combine to make genomic studies of *Orientia* infection  
92 challenging. The bacterium is an obligate intracellular pathogen, necessitating  
93 cell culture for laboratory propagation <sup>20</sup>. *Orientia* is typically collected from a  
94 range of specimen types including human whole blood, buffy coat and eschar  
95 tissue, rodent blood and organs, and chiggers, and the absolute quantity of *O.*  
96 *tsutsugamushi* DNA present in these specimen types is variable, but frequently  
97 low. *Orientia* can only be propagated in cell culture, which is technically  
98 demanding <sup>20</sup> and costly and must be performed in biosafety level 3 facilities <sup>21</sup>.

99 In one study of 155 infected human blood samples tested by 16S PCR, the median  
100 pathogen genome load was 0.013 copies/ $\mu$ L, the interquartile range 0-0.334 and  
101 the maximum 310 <sup>22</sup>, while a recent study from Thailand reported a range of 13.8

102 to 2,252 copies/ $\mu$ L<sup>23</sup>. Very few data are available for the quantity of *O.*  
103 *tsutsugamushi* in individual chiggers and there are no published data from  
104 rodents. The *O. tsutsugamushi* genome is relatively poorly defined, with just nine  
105 complete genome sequences, and shows a high density of repetitive elements  
106 and extreme rates of genomic rearrangement, two added challenges that make  
107 innovative approaches to sample preparation, sequencing and analysis essential  
108 <sup>19,24,25</sup>.

109 Next-generation sequencing (NGS) techniques have become the gold standard for  
110 revealing the genetic variation of organisms<sup>26</sup>. Culture of *O. tsutsugamushi* in  
111 eukaryotic cells can increase the quantity and concentration of DNA available for  
112 downstream whole-genome sequencing by thousands of fold. This technique is  
113 technically demanding, costly, time-consuming and prone to contamination.  
114 Handling infected-cell cultures is also hazardous and carries a risk of infection in  
115 those accidentally exposed<sup>21</sup>. The entire process must be undertaken in biosafety  
116 level 3, with all its associated costs and complications.

117 Targeted enrichment sequencing is a tool whereby certain pre-selected regions of  
118 the genome are targeted for sequencing, via hybridisation to a set of probes  
119 corresponding to the sequences of interest. The method is akin to, and works  
120 similarly to, whole-exome sequencing where just the “exome” or coding portion of  
121 the human genome is sequenced. Targeted enrichment can be useful where the  
122 whole genome is not required, or a particular genome of interest is selected from  
123 contaminating DNA<sup>27,28</sup>, for example in the metagenomic analysis of multiple  
124 virus species, where culture is difficult and costly<sup>29-31</sup>, and for *Neisseria*  
125 *meningitidis* directly from cerebrospinal fluid, where culture often fails due to

126 prior antibiotic treatment <sup>32</sup>. Thus, the method in principle provides an efficient  
127 alternative to cell culture combined with whole-genome sequencing for *Orientia*.

128 In summary, the many difficulties associated with conducting a large-scale study  
129 at the whole-genome level of *O. tsutsugamushi* in human, chiggers and small  
130 mammal samples prompted the development of a probe-based targeted  
131 enrichment sequencing strategy, which was used to examine phylogeographical  
132 relatedness of samples collecting in Northern Thailand and elsewhere.

### 133 **Materials and Methods**

#### 134 **Sample collection**

135 Small mammals were trapped alive in wire-mesh traps baited with corn. Animals  
136 were killed using the inhalational anaesthetic isoflurane. Chiggers were collected  
137 from rodents by removing the ears and placing into tubes containing 70% ethanol  
138 and stored at 4°C. The rodent lung, liver and spleen were removed, preserved in  
139 70% ethanol and stored at -80°C <sup>33</sup>. International standards were stringently  
140 followed for animal-handling and euthanasia procedures <sup>34,35</sup>. Free-living chiggers  
141 were collected using the black plate method <sup>36,37</sup>. Human blood and eschar  
142 samples were collected during the non-malarial fever studies in Laos <sup>16</sup> and the  
143 natural immune response to paediatric scrub typhus study in Thailand and stored  
144 at -80°C <sup>38</sup>. Chiggers were identified using autofluorescence and bright-field  
145 microscopy <sup>39</sup> with reference to a range of taxonomic keys <sup>40-42</sup>. Ethical approval  
146 was obtained from Kasetsart University Animal Ethics Committee (EC), Bangkok,  
147 Thailand for animal collection; the Faculty of Tropical Medicine EC, Mahidol  
148 University, Bangkok, the Chiangrai Prachanukroh Hospital EC, the Chiangrai  
149 Provincial Public Health EC and the Oxford Tropical Research EC for human

150 samples in Thailand and additionally the Lao National Committee for Health  
151 Research for human samples in Laos.

## 152 **DNA extraction and PCR**

153 DNA was extracted from individual chiggers, pools of chiggers, rodent tissues and  
154 human samples using the Qiagen Blood and Tissue Kit (Qiagen, USA). The  
155 procedures prior to protein digestion were as follows. Chiggers were rinsed with  
156 distilled water and individuals cut through the mid-gut using a sterile 30G needle  
157 under a dissecting microscope and pools crushed using a sterile polypropylene  
158 motorized pestle (Motorized pellet pestle Z35991, Sigma Aldrich, St Louis, MO).  
159 Rodent tissues were cut into a small piece ( $\leq 10$ mg of spleen or  $\leq 25$ mg of liver or  
160 lung). Buffy coat or whole blood was extracted from a starting volume of 200  $\mu$ l.  
161 Eschars were collected either as pieces of crust in 70% ethanol or swabs. Chigger,  
162 rodent and eschar swabs were incubated with proteinase K at 56°C for 3 hours.  
163 Whole blood and buffy coat was incubated for 1 hour and eschar crust was  
164 incubated overnight. The rest of the steps followed the manufacturer's protocol.  
165 Chigger samples were eluted in 45  $\mu$ l, while rodent and human samples were  
166 eluted in 100  $\mu$ l of buffer AE (Qiagen, Hilden, Germany). Samples were stored at -  
167 20°C before PCR.

168 Quantitative real-time PCR targeting the 47kDa *O. tsutsugamushi* outer-membrane  
169 protein was performed on all rodent, chigger and human samples<sup>43</sup>. A PCR master  
170 mix was prepared by combining the following reagent volumes per sample: 15  $\mu$ l  
171 of Platinum PCR Supermix UDG (Sigma Aldrich, USA), 0.25  $\mu$ l each of Forward and  
172 Reverse Primers (10  $\mu$ M) and 0.5  $\mu$ l of Probe (10  $\mu$ M). For chigger samples 4  $\mu$ l of  
173 sterile water and 5  $\mu$ l of DNA was added. For rodent and human samples 8  $\mu$ l of

174 sterile water and 1  $\mu$ L of DNA added to complete the Master Mix. PCR was run with  
175 the following conditions: 2 minutes at 50°C, then denaturation at 95°C for 2  
176 minutes, followed by 45 cycles of 95°C for 15 seconds and 60°C for 30 seconds.  
177 Real-time PCR was performed on a Bio Rad CFX96 (Bio Rad, USA) using in-house  
178 quantitative standards. Duplicate 10-fold concentrations from 10<sup>0</sup> to 10<sup>6</sup> (1  $\mu$ L  
179 each) and two no-template controls were included on every run.

### 180 **Library preparation**

181 In the first round of sequencing in this study, the Nextera XT DNA library  
182 preparation kit (Illumina Inc, San Diego, USA) methodology was used to prepare  
183 libraries, predominantly for human-derived samples. High duplication rates and  
184 relatively low coverage for this approach resulted in a switch to a whole-genome  
185 amplification (WGA) step prior to a ligation-based library preparation method.

186 For Nextera XT libraries, DNA was normalized for an input of  $\leq$ 1 ng in 5  $\mu$ L across  
187 all samples and libraries were prepared following the manufacturer's protocol.

188 For whole-genome amplified libraries, specimens from input volumes ranging  
189 from 40  $\mu$ L (chiggers) and  $\sim$ 50  $\mu$ L (human samples), to 95  $\mu$ L for small mammal  
190 samples were dried using a Speed-Vac (Eppendorf, Hamburg, Germany) and  
191 resuspended in 2.5  $\mu$ L of TE. WGA was performed following the manufacturer's  
192 protocol for the REPLI-g Single Cell Kit (Qiagen, Hilden, Germany).

193 The concentration of the amplified DNA was assessed using a Qubit dsDNA HS  
194 Assay (Thermo Fisher, MA, USA). Samples were normalized to 500 ng mass in 34  
195  $\mu$ L DNA and fragmented using an Episonic instrument, (EpiGentek, NY, USA) with  
196 the following settings: Amplitude 40, Process time 00:03:20, Pulse-ON time



197 00:00:20, Pulse-OFF time 00:00:20. The fragmented DNA was cleaned with a 1X  
198 ratio of AMPure XP beads (Beckman Coulter, Indianapolis, USA), resuspended in  
199 34  $\mu$ L.

200 Libraries were prepared using the NEBNext Ultra DNA Library Prep Kit for  
201 Illumina (New England Biolabs) with a modified protocol. In detail, 6.5  $\mu$ L  
202 NEBNext End repair reaction buffer, 0.75  $\mu$ L NEBNext End prep enzyme mix and  
203 24.25  $\mu$ L nuclease-free water were added to each sample and incubated at 20°C  
204 for 30 mins and 65°C for 30 minutes. Next, ligation of an in-house Y-adapter was  
205 performed by adding 3.75  $\mu$ L of Blunt/TA Ligase master mix, 1  $\mu$ L of Ligation  
206 enhancer, 1.5  $\mu$ L of 15  $\mu$ M adapter and 12.25  $\mu$ L of nuclease-free water to each  
207 sample. This was then incubated for 15 minutes at 20°C, followed by an AMPure  
208 XP bead clean-up using 86.5  $\mu$ L of beads and finally eluted into 100  $\mu$ L EB buffer.

209 For sequencing on the Illumina HiSeq4000, an AMPure XP size-selection was then  
210 performed by adding 52  $\mu$ L of AMPure XP to the DNA, mixing, incubating for 5  
211 minutes at room temperature and then transferring to a magnet for 8 minutes. The  
212 supernatant was then transferred to a fresh plate and the process repeated using  
213 25  $\mu$ L of AMPure XP. Finally, the beads were washed twice with ethanol and  
214 resuspended in 20  $\mu$ L of EB buffer.

215 PCR was then performed on the library using 10  $\mu$ L of Pre-PCR library, 5  $\mu$ L of  
216 indexed primer i5 and i7, 10  $\mu$ L water and 25  $\mu$ L NEBNext Q5 PCR Master Mix. The  
217 following conditions were used: 98°C for 30secs, 98°C for 10secs, 65°C for 30secs,  
218 72°C for 30secs, 72°C for 5mins and 10 cycles performed.

219 A final AMPure XP bead clean-up was carried out using 37.5  $\mu$ L of beads and eluted  
220 in 30  $\mu$ L of EB buffer. Qubit and TapeStation DNA analysis was performed for all  
221 libraries prior to target enrichment.

## 222 **Target enrichment**

223 Paired-end DNA libraries prepared using either WGA followed by an in-house  
224 library preparation, or Nextera XT, were pooled for capture using pre-designed  
225 Agilent SureSelectXT Custom 3-5.9Mb probes and the capture module of the  
226 SureSelectXT Reagent Kit, HSQ (Agilent).

227 The pool of indexed libraries was first normalized to 750 ng in 3.4  $\mu$ L. A Master  
228 Mix containing 2.5  $\mu$ L of SureSelect Indexing Block #1, 2.5  $\mu$ L SureSelect Block #2,  
229 3  $\mu$ L IDT xGen Blocking Oligos was prepared. This was added to the sample, mixed  
230 and placed on a thermocycler at 95°C for 5 minutes and then 65°C for 5 minutes.

231 Next the Hybridization Buffer Master Mix (SureSelect Hyb #1 to #4 and RNase  
232 Block) in a total volume 13.5  $\mu$ L was prepared. 5  $\mu$ L of baits were aliquoted and  
233 added to the Hybridization Buffer Master Mix. This was then transferred to the  
234 samples held at 65°C and incubated for 24hrs.

235 Dynabeads MyOne Streptavidin T1 beads were prepared using the  
236 manufacturer's standard protocol. The PCR plate was maintained at 65°C while  
237 moving the samples to the bead plate and pipette mixing. Samples were then  
238 incubated on a mixer at 1100 rpm for 30 minutes at room temperature. Samples  
239 were then spun briefly, placed on a magnetic rack and the supernatant removed  
240 and saved. The beads were resuspended in 200  $\mu$ L of SureSelect Wash Buffer 1  
241 and incubated for 15 minutes at room temperature, replaced on the magnetic

242 rack and the supernatant discarded. The procedure was repeated with  
243 SureSelect Wash Buffer 2, incubated for 10 minutes at 65°C and discarding the  
244 supernatant as before. The process was repeated 3 times. The beads were then  
245 resuspended in 30 µL of distilled water, of which 14 µL was transferred to a post-  
246 hybridization PCR using the following PCR Master Mix (Herculase II Reaction  
247 buffer, 100mM dNTP Mix, qPCR Library Quantification Primer Premix, nuclease  
248 free water and Herculase II Fusion DNA Polymerase), with the cycle parameters  
249 of: 98°C for 2mins then 14 cycles of 98°C for 30secs, 57°C for 30secs, 72°C for 1  
250 min, followed by a final extension of 72°C for 10 minutes.

## 251 **Sequencing**

252 Sequencing was performed on the Illumina HiSeq4000 with paired-end 150 bp  
253 reads.

## 254 **Bioinformatic analysis**

255 Raw reads generated from Illumina HiSeq4000 were mapped to the UT76  
256 reference genome (GCF\_900327255.1) using BWA MEM v0.7.12<sup>44</sup>. Samtools  
257 flagstat v1.8 was used to summarise the total number of reads and the proportion  
258 mapping to the reference. The reads were then deduplicated using Picard  
259 MarkDuplicates v2.0.1 and the same statistics were recalculated, along with the  
260 total number of fragments present in the library. Depth of coverage across the  
261 whole genome and the proportion of the core genome represented at 1x, 5x and  
262 10x minimum per-base coverage was calculated using GATK v3.7<sup>45</sup>.

263 Haploid variant calling and core genome alignment was performed using Snippy  
264 v4.3.6<sup>46</sup>. The method identified single nucleotide polymorphisms (SNPs) between

265 the sequence reads and the reference genome. The variant calls were used as input  
266 to construct maximum-likelihood (ML) phylogenetic trees using iqtree v1.3.11 <sup>47</sup>.  
267 The most suitable model was selected using ModelFinder Plus which computes  
268 the log-likelihoods of an initial parsimony tree for many different models and the  
269 Akaike information criterion (AIC), corrected AIC and Bayesian information  
270 criterion (BIC) <sup>48</sup>. To estimate branch supports of the phylogenetic tree inferred  
271 from the multiple sequence alignment, ultrafast bootstrap approximation was  
272 used <sup>49</sup>.

### 273 **Data availability**

274 The sequences uploaded to generate Agilent SureSelect capture probes are  
275 available through Figshare at 10.6084/m9.figshare.12546377. The sequence  
276 reads are available in the Sequence Read Archive under project PRJEB39975.  
277 For sequence read sets obtained from human samples, reads mapping to the  
278 human genome using Bowtie2 were removed from the data before uploading.

### 279 **Results**

280 A total of 184 small mammals were trapped at 5 sites in Northern Thailand: Ban  
281 Thoet Thai (20.24°N, 99.64°E), Mae Fahluang district; Ban Song Kwair (20.02°N,  
282 99.75°E) and Ban Mae Khao Tom (20.04°N, 99.95°E) and Ban Mae Mon  
283 (19.85°N, 99.61°E), Meuang district in Chiang Rai Province and Ban Huay Muang  
284 (19.14°N, 100.72°E), Tha Wang Pha district, Nan Province. One chigger sample  
285 was collected on the Penghu Islands, Taiwan (23.57°N, 119.64°E). Human  
286 samples were collected from Chiang Rai Province, Northern Thailand, across  
287 Laos and one from Green Island, Taiwan (22.66°N, 121.49°E).

### 288 **Probe design**

289 The probes were designed in the following way, aiming to ensure that the full  
290 diversity of the *O. tsutsugamushi* genome would be successfully captured. Two  
291 finished reference strains (Boryong and Ikeda) plus seven other assemblies  
292 available at the time of probe design were used (Gilliam: GCF\_000964615.1, Karp:  
293 GCF\_000964585.1, Kato: GCF\_000964605.1, TA716: GCF\_000964855.1, TA763:  
294 GCF\_000964825.1, UT144: GCF\_000965195.1, UT76: GCF\_000964835.1). The  
295 complete Boryong strain was used as a reference genome and the whole genome  
296 was included in the probe design. To cover genes not found in the Boryong  
297 genome, or which had high levels of divergence from the Boryong genome, the  
298 genome assemblies were reannotated using Prokka v1.11 and predicted open  
299 reading frames from all eight genomes were clustered into groups based on  
300  $\geq 80\%$  identity at the protein sequence level using Roary v3.6.0<sup>50</sup>. For each  
301 cluster, an alignment of the corresponding DNA sequences (using Clustal Omega  
302<sup>51</sup>) was divided into windows of 120 nt in which every aligned sequence was a  
303 candidate probe. Probes were then chosen until every sequence in each cluster  
304 was represented by a probe with  $< 10\%$  DNA sequence, a strategy informed by  
305 previous work demonstrating efficient capture with probe target divergence up to  
306  $20\%$ <sup>31</sup> and the requirement to capture as-yet uncharacterised sequences. The  
307 reference Boryong gene sequence was always included if it had a representative  
308 in the cluster under consideration and sequences that would capture human and  
309 rodent genomes (*Rattus norvegicus*) were excluded. The probe design strategy  
310 generated a total sequence length of 4.7Mb which was synthesised as a single  
311 Agilent SureSelect probe pool. The FASTA file containing the sequences uploaded  
312 for probe design is available at [10.6084/m9.figshare.12546377](https://doi.org/10.6084/m9.figshare.12546377).

### 313 **Validation using spiked samples**

314 To create the spike-in solution, DNA was extracted from 20 chiggers of the genus  
315 *Walchia* that had previously tested negative for *O. tsutsugamushi* using the 47 kDa  
316 real-time PCR. DNA extraction was performed using the methods described  
317 previously. The 20 extracted DNA samples (40 $\mu$ L each) of negative chiggers were  
318 pooled and then split into 20 tubes, such that the sample was equivalent to the  
319 mean amount of DNA extracted from a chigger.

320 *O. tsutsugamushi* (strains UT76 and CRF136) DNA extracted from cell culture  
321 was used to create the dilution series. The concentration was 838 ng/ $\mu$ L with  
322 82% of the DNA being from *O. tsutsugamushi* and 18% from contaminants, (as  
323 estimated by qPCR and bulk sequencing of the isolate) giving a starting  
324 concentration of *O. tsutsugamushi* of 687 ng/ $\mu$ L. 100,000 copies of *O.*  
325 *tsutsugamushi* = 0.227 ng of DNA. 100,000 copies/ $\mu$ L = 0.42 ng/ $\mu$ L of UT76 stock  
326 solution (assuming DNA is 82% *O. tsutsugamushi*). To create a final  
327 concentration of 0.42 ng/ $\mu$ L equivalent to 100,000 copies/ $\mu$ L: 2  $\mu$ L of *O.*  
328 *tsutsugamushi* DNA was added to 18  $\mu$ L of water, mixed thoroughly and 5  $\mu$ L of  
329 this removed and added to 45  $\mu$ L of water, mixed again and then 2  $\mu$ L added to  
330 38  $\mu$ L water. The following concentrations were made following a dilution series  
331 using the prepared *O. tsutsugamushi* and chigger solutions: 100,000, 50,000,  
332 25,000, 10,000, 5,000 and 1,000 copies.

333 The results of the spiked sample sequencing are shown in Figure 1 and  
334 Supplementary Table 1. Total reads of  $2.2 \times 10^5$  to  $8.5 \times 10^6$  were obtained for each  
335 sample, with 32-93% of reads mapping to the target genome. Due to the highly  
336 repetitive nature of the *O. tsutsugamushi* genome, which varies hugely between

337 strains, we chose to measure coverage statistics by using coverage across 657  
338 core genes previously identified as present in all samples <sup>19</sup>, covering 685kb of  
339 the 2.2Mb genome. The proportion of the core genome covered with  $\leq 10$  reads  
340 ranged from 14.3 to 99.8. The percentage of reads which were identified as  
341 sequencing duplicates ranged from 51 to 66%, with a greater duplication rate in  
342 the samples with lower quantities of target DNA, as expected.

### 343 **Validation of real samples**

344 The low-input Nextera library preparation method was subsequently applied to  
345 human samples. This provided inconsistent results, thought to be driven by low  
346 and inconsistent amounts of input DNA leading to low-complexity libraries,  
347 highly variable pooling and high duplication rates. We therefore altered the  
348 library preparation to include a whole-genome amplification step and re-  
349 validated using spiked samples, which resulted in lower duplication rates  
350 (Supplementary Figure 1 and Supplementary Table 1); all subsequent batches  
351 were sequenced with an initial whole-genome amplification step.  
352 Sixty-nine human *O. tsutsugamushi* PCR positive samples from scrub typhus  
353 patients were selected from retrospective collections, covering a wide  
354 geographical range: 33 from Chiang Rai province in Thailand, 39 from Laos and 1  
355 from Taiwan (Figure 2). Among these, 31 were buffy coat samples, 18 whole  
356 blood and 20 eschars (including eschar tissue and eschar swabs). The samples  
357 include 11 paired samples with whole-blood/buffy coat and eschar samples from  
358 patients collected in Chiang Rai (9 pairs) and Laos (2 pairs).  
359 Ninety-one *O. tsutsugamushi* PCR positive pooled chigger samples (mean 26  
360 individuals per pool) were selected. These were composed of both pure and  
361 mixed species pools collected from 36 small mammals, with multiple pools from

362 some animals (Supplementary Table 1). A total of 27 *O. tsutsugamushi* PCR  
363 positive individual chiggers collected from rodents were included of 8 species in  
364 5 genera. These included *L. deliense*, *L. imphalum*, *Walchia kritochoeta* and *W.*  
365 *micropelta*. Chiggers were collected from 5 sites in Northern Thailand and the  
366 Penghu Islands, Taiwan. A single free-living chigger (*L. imphalum*) from Ban  
367 Thoet Thai was included. *O. tsutsugamushi*-infected colony chiggers from 3  
368 different species were included, provided by the Armed Forces Research  
369 Institute for Medicine (AFRIMS) in Bangkok, Thailand. Six lung and 3 liver tissue  
370 samples were included from 7 small mammals of 3 species. Both liver and lung  
371 from the same animal were tested in 2 cases. These were collected from 4 sites in  
372 Chiang Rai Province (Figure 2).

373 All samples were PCR positive for the 47kDa gene. The  $C_t$  values for the samples  
374 ranged from 24.6 to 41.3 cycles.

375 We assessed the sample sequencing based on the number and proportion of  
376 reads generated which map to the reference genome, the coverage of the core  
377 genes, and the sequence duplication rate (Figure 3). In most samples, only a  
378 small proportion of reads mapped to the reference genome, reflecting the  
379 performance of the methodology on samples that in general had very small  
380 amounts of *O. tsutsugamushi* sequences. Among the different chigger sample  
381 types, colony chiggers performed well, with a high percentage of reads mapped  
382 to the reference genome likely reflecting their higher input total copy number  
383 and corresponding lower  $C_t$  (mean 29.4, range 28.6-30.2). Chigger pools and  
384 individual chiggers from rodents had high variability but with some samples  
385 having high levels of reads mapped to the reference genome and  
386 correspondingly a high percentage of the genome covered at 10X coverage.  $C_t$



387 values for individual chiggers were higher (mean 36.4, median 37, range 30.2-  
388 40.2) compared to chigger pools (mean 31.3, median 30.9, range 24.6-40.3).  
389 Among the human samples, buffy coat and eschar samples gave more variable  
390 performance, with very few samples having sufficient genome coverage to be  
391 used in variant calling, and whole blood performed least well with percentage of  
392 the core genome covered at 10X or more under 1% in all samples and median  
393 percentage of reads mapped to the reference genome of 0.72%. Rodent tissue  
394 samples performed poorly in all cases. The relatively low  $C_t$  values for colony  
395 chiggers and their high core genome coverage may reflect the unusual ecological  
396 scenario of long-term colony chiggers that may result in higher loads of *O.*  
397 *tsutsugamushi* than wild chiggers.

398 We expected a positive association between the rate of reads matching *Orientia*  
399 sequences and the number of *Orientia* genome copies detectable by qPCR. We  
400 compared the fraction of reads which mapped to the  $C_t$  values (Supplementary  
401 Figure 2). Colony chiggers had the highest fraction of reads mapped to the  
402 reference genome and tended to have the lowest  $C_t$  (Supplementary Figure 2). A  
403 lower  $C_t$  (higher input number of genomes) was correlated with the percentage  
404 of reads mapped to the reference (Spearman's rank order correlation=-0.70,  
405  $p=1.05 \times 10^{-35}$ ) (Supplementary Figure 2).

406 The multiple sample types had a wide range of estimated genome copies, as well  
407 as different properties such as total DNA content, which change the ratio of  
408 target to non-target DNA. Many samples fell near the lower limit of detection of  
409 the qPCR assay, with 69/205 (34%) had a  $C_t$  value of >35 It appears that a  $C_t$  of  
410  $\geq 35$  results in poor coverage and low percentage mapping to the reference.

411 Variant calling was performed on the entire set of sequenced samples. Due to the  
412 low sequence coverage for many samples, phylogenetic comparisons were  
413 attempted only for a set of 31 samples with >50,000 bases called: 4 chigger pools  
414 from Ban Mae Mon, Thailand, 1 human buffy coat sample from Na Meuang, Laos,  
415 1 individual chigger from the Penghu Islands, Taiwan, 4 individual chiggers and  
416 17 chigger pools from Ban Thoet Thai, Thailand, and 4 colony chiggers. The  
417 median  $C_t$  value for these samples was 29.0 (range 25.4-34.2). The distribution of  
418 bases called for these 31 samples is shown in Supplementary Figure 4. Coverage  
419 for each core gene is shown in the heatmap in Supplementary Figure 5. For  
420 almost all samples, there is some sequence coverage for each of the core genes,  
421 and for those with fewer positions called it is due to incomplete coverage across  
422 the genome rather than genes which are completely uncovered in sequencing. A  
423 notable exception is sample C0546, which has many genes which have no  
424 coverage at all but sufficient coverage in the remaining genes to meet the  
425 50,000bp threshold. A small number of genes were completely uncovered in  
426 multiple samples, most notably several genes which have no coverage in any of  
427 the samples taken from the R240 pools from a rodent in Ban Mae Mon.  
428 The phylogeny is shown in Figure 4. Branch bootstrap values, which can be  
429 interpreted as the relative (%) support of the data for the tree topology  
430 represented by the pairings of isolates or groups of isolates on either side of the  
431 labelled branch, are plotted on the tree and fall below 70% support for some  
432 branches, indicating some uncertainty in tree topology. The samples include two  
433 colony chiggers from the same *L. deliense* colony. These samples are closely  
434 related but not identical (35 SNPs between the two samples).

435

436 **Discussion**

437 We have successfully developed and tested the first whole-genome sequencing of  
438 *O. tsutsugamushi* performed without prior cell culture. The sequence data  
439 generated provided an opportunity to compare *O. tsutsugamushi* strains with  
440 greater resolution than previously possible.

441 The sequencing results displayed great variability, with sufficient success to call  
442 variants and perform phylogenetic analysis in a proportion of samples from  
443 individual chiggers and chigger pools. The yield of unique on-target reads,  
444 particularly at the low copy number dilutions (5,000 and 10,000 copies) was  
445 higher for WGA before library preparation than for Nextera XT, and the  
446 duplication rate was also improved. The low success rate likely reflects very low  
447 quantities of *O. tsutsugamushi* DNA present in many samples, especially human  
448 samples, and reflects the current limit of our enrichment method which cannot  
449 enrich sufficiently to overcome the low levels of input DNA. While no firm  $C_t$   
450 cutoff value can be established above which target enrichment sequencing  
451 cannot be successfully performed, samples with a  $C_t$  value of 35 or less are  
452 candidates for sequencing. Methods for human and rodent DNA depletion prior  
453 to sequence capture may improve the performance of enrichment. The first full  
454 genome of *L. deliense* has been published since this array was designed, and this  
455 could be used to check for any sequences in the array design which may capture  
456 off-target chigger DNA <sup>52</sup>.

457 A recent study has reported phylogenetic comparisons of *O. tsutsugamushi*  
458 strains from chiggers collected from the same host animal, based on sequencing  
459 of a single gene (encoding the 56 kDa antigen) <sup>53</sup>. Results revealed mixed  
460 infections; with some chiggers containing a single genotype and others mixed

461 genotypes. There is also evidence of different *O. tsutsugamushi* 56 kDa type-  
462 specific antigen genotypes being maintained and transmitted transovarially in  
463 colony chiggers<sup>54</sup>.

464 The sequence capture probes used in this experiment were designed when only  
465 two complete genomes were available to use in the design process. Of the  
466 incomplete assemblies included in the design process, two strains have been  
467 removed from RefSeq due to problems with the assembly, and more complete  
468 genomes are now available. A new probe design using the same approach but  
469 more genomes may improve the capture efficiency.

470 Despite the poor performance for the target enrichment sequencing on some  
471 samples, we were able to generate a phylogeny using 30 chigger samples, 1  
472 human sample, and 8 complete reference genomes, which represents the first  
473 phylogenetic analysis of *O. tsutsugamushi* from chiggers. Among the 31 best-  
474 sequenced samples, >98.5% of the core genes of the reference sequence were  
475 covered by at least one read at all positions. For most samples, the regions of no  
476 coverage were confined to a very few genes, some of which were present in all  
477 samples. Intriguingly, for chigger pools from Ban Mae Mon (R240), more genes  
478 were incompletely covered, and most of these were present in all samples, even  
479 though the total volume of on-target reads (equivalently, the average coverage of  
480 the core genome) was similar in these samples as in other high-performing  
481 samples. This could be due to diversity in these genes beyond the limits of what  
482 our probes are able to capture; however, the sequence capture probes have been  
483 shown to be effective at up to 20% sequence divergence<sup>31</sup>, and the overall  
484 diversity between our phylogenetic samples is well below this limit. It is more  
485 likely that the set of core genes determined from the known complete genomes is

486 not universally present in all strains.

487 The study included strains sequenced from chiggers collected from a single host  
488 animal, strains from chiggers from several animals at a single study site of  
489 <10km<sup>2</sup> and from two sites 45km apart. Samples from Ban Mae Mon are clearly  
490 distinct from samples from Ban Thoet Thai, which group together (Figure 4). All  
491 the chigger pools and individuals from Ban Thoet Thai consisted of the known  
492 vector *L. imphalum* (with or without some *Walchia* species). The Taiwanese  
493 chigger was the known human vector *L. deliense*. The R240 pools from Ban Mae  
494 Mon, which form a distinct cluster separate from all other samples, were  
495 collected from the scansorial tree shrew *Tupaia glis* and consisted of *L. turdicola*  
496 and *Helenicula naresuani* chiggers – neither known to be human vectors nor  
497 previously reported as being infected with *O. tsutsugamushi*. The reference  
498 genomes, which were collected from five different countries between 1943 and  
499 2010, are spread throughout the tree and many are more closely related to the  
500 samples from Ban Thoet Thai than the samples from Ban Mae Mon are to those  
501 samples. A possible explanation for this is that *O. tsutsugamushi* has been  
502 previously introduced into these two locations from divergent sources and  
503 continues to evolve locally on a small scale, and larger-scale *O. tsutsugamushi*  
504 movement between locations is a rare event due to the restricted range of the  
505 host species.

506 Important questions remain about the role of recombination between strains in  
507 infected chiggers and to what extent the accessory genome of *Orientia* is open or  
508 closed. The sequence capture approach used in this study does not recover the  
509 complete accessory genome, and hence cannot assist with the latter question.

510 The accumulation of more high-quality sequences may allow characterization of

511 the recombination landscape. However, *O. tsutsugamushi* genomes are known to  
512 have poorly conserved synteny, which is likely to complicate analysis of  
513 incomplete genomes.

514 Among captured sequences, pairwise divergences were in the range of 0-4%,  
515 well within the reach of probe-based sequence enrichment for pathogen  
516 genomics<sup>31</sup>. This illustrates the robustness and adaptability of probe-based  
517 sequence enrichment, providing a means for genome-wide amplification of  
518 sequence information without the need to validate a very large number of PCR  
519 primers, any of which could fail because of hitherto uncharacterised sequence  
520 variation.

521 The methods developed in this project have, for the first time in scrub typhus  
522 research, demonstrated phylogeographic clustering of *O. tsutsugamushi* strains  
523 at international, provincial and highly local scales. This shows that both closely  
524 related and more distantly related strains may co-exist in one site. As methods  
525 improve and can be applied to a greater range of samples, particularly sympatric  
526 rodents and exposed humans, further insights into this fascinating  
527 phylogeographic variation will be revealed with important consequences for  
528 diagnostic tests and vaccine development strategies.

## 529 **Acknowledgments**

530 We are very grateful to Associate Professor Bounthaphany Bounxouei, ex-  
531 Director of Mahosot Hospital, the Director and staff of the Microbiology  
532 Laboratory, LOMWRU and wards, Assistant Professor Chanphomma  
533 Vongsamphan, ex-Director of Department of Health Care, Ministry of Health, and  
534 H.E. Professor Bounkong Syhavong, Minister of Health, Laos, for their help and  
535 support. We thank the Director and staff of the Microbiology Laboratory and the

536 staff of LOMWRU for their wonderful help, Dr Chi-Chien Kuo and colleagues at  
537 the National Taiwan Normal University, Taipei for facilitating chigger collection  
538 on the Penghu Islands. We thank Sebastiaan Van Hal for providing the human  
539 sample from Taiwan. We are very grateful to Rawadee Kumlert at Mahidol  
540 University for her assistance in mite morphotyping, and all the staff at the  
541 Chiangrai Clinical Research Unit and field teams, in particular Piangnet Jaiboon,  
542 Dr Tri Wangrangsimakul, Dr Serge Morand and Dr Kittipong Chaisiri. We thank  
543 Prof Alistair Darby for comments on the manuscript.  
544 Material has been reviewed by the Walter Reed Army Institute of Research.  
545 There is no objection to its presentation and/or publication. The opinions or  
546 assertions contained herein are the private views of the author, and are not to be  
547 construed as official, or as reflecting true views of the Department of the Army or  
548 the Department of Defense. Research was conducted under an approved animal  
549 use protocol in an AAALACi accredited facility in compliance with the Animal  
550 Welfare Act and other federal statutes and regulations relating to animals and  
551 experiments involving animals and adheres to principles stated in the Guide for  
552 the Care and Use of Laboratory Animals, NRC Publication, 2011 edition.

553

#### 554 **Financial Support**

555 This study was supported by Ivo Elliott's Wellcome Trust Research Training  
556 Fellowship (105731/Z/14/Z and in part by Core Awards to the Wellcome Centre  
557 for Human Genetics (090532/Z/09/Z and 203141/Z/16/Z) and by the Wellcome  
558 Trust Core Award Grant Number 203141/Z/16/Z with additional support from  
559 the NIHR Oxford BRC. The views expressed are those of the author(s) and not  
560 necessarily those of the NHS, the NIHR or the Department of Health.

561

562 **CReDiT Author statement**

563 **Ivo Elliott:** Conceptualization, Methodology, Formal analysis, Investigation,  
564 Writing -Original Draft, Funding acquisition. **Neeranuch Thangnimitchok:**  
565 Investigation, Writing – Review & Editing. **Mariateresa de Cesare:** Investigation,  
566 Validation, Writing – Review & Editing. **Piyada Linsuwanon:** Resources. **Daniel**  
567 **Paris:** Conceptualization, Methodology, Supervision, Writing – Review & Editing.  
568 **Nicholas Day:** Conceptualization, Writing – Review & Editing, Supervision. **Paul**  
569 **Newton:** Conceptualization, Writing – Review & Editing, Supervision. **Rory**  
570 **Bowden:** Conceptualization, Methodology, Formal analysis, Writing – Review &  
571 Editing, Supervision, Funding acquisition. **Elizabeth Batty:** Conceptualization,  
572 Methodology, Software, Validation, Formal analysis, Data Curation, Writing –  
573 Original Draft, Supervision.

574

575 **Conflict of interests:**

576 IE, NT, MdC, PL, DHP, NDJP, PNN, RB, EMB - none

577

578 **References**

- 579 1. Izzard L, Fuller A, Blacksell SD, et al. Isolation of a novel *Orientia* species  
580 (*O. chuto* sp. nov.) from a patient infected in Dubai. *J Clin Microbiol* 2010; **48**(12):  
581 4404-9.
- 582 2. Weitzel T, Dittrich S, Lopez J, et al. Endemic Scrub Typhus in South  
583 America. *N Engl J Med* 2016; **375**(10): 954-61.
- 584 3. Kolo AO, Sibeko-Matjila KP, Maina AN, Richards AL, Knobel DL, Matjila PT.  
585 Molecular Detection of Zoonotic Rickettsiae and Anaplasma spp. in Domestic  
586 Dogs and Their Ectoparasites in Bushbuckridge, South Africa. *Vector Borne*  
587 *Zoonotic Dis* 2016; **16**(4): 245-52.
- 588 4. Cosson JF, Galan M, Bard E, et al. Detection of *Orientia* sp. DNA in rodents  
589 from Asia, West Africa and Europe. *Parasit Vectors* 2015; **8**: 172.
- 590 5. Masakhwe C, Linsuwanon P, Kimita G, et al. Identification and  
591 characterization of *Orientia chuto* in trombiculid chigger mites collected from  
592 wild rodents in Kenya. *J Clin Microbiol* 2018; **56**: e01124-18.
- 593 6. Rapmund G, Upham RW, Jr., Kundin WD, Manikumar C, Chan TC.  
594 Transovarial development of scrub typhus rickettsiae in a colony of vector mites.  
595 *Trans R Soc Trop Med Hyg* 1969; **63**(2): 251-8.
- 596 7. Frances SP, Watcharapichat P, Phulsuksombati D. Vertical transmission of  
597 *Orientia tsutsugamushi* in two lines of naturally infected *Leptotrombidium*  
598 *deliense* (Acari: Trombiculidae). *J Med Entomol* 2001; **38**(1): 17-21.
- 599 8. Urakami H, Okubo K, Misumi H, Fukuhara M, Takahashi M. Transovarial  
600 transmission rates of *Orientia tsutsugamushi* in naturally infected



- 601 Leptotrombidium colonies by immunofluorescent microscopy. *Med Entomol Zool*  
602 2013; **64**(1): 43-6.
- 603 9. Lerdthusnee K, Khuntirat B, Leepitakrat W, et al. Scrub typhus: vector  
604 competence of *Leptotrombidium chiangraiensis* chiggers and transmission  
605 efficacy and isolation of *Orientia tsutsugamushi*. *Ann N Y Acad Sci* 2003; **990**: 25-  
606 35.
- 607 10. Santibanez P, Palomar AM, Portillo A, Santibanez S, Oteo JA. The role of  
608 chiggers as human pathogens. In: Samie A, ed. An overview of tropical diseases:  
609 InTech; 2015: 173-202.
- 610 11. Elliott I, Pearson I, Dahal P, Thomas NV, Roberts T, Newton PN. Scrub  
611 typhus ecology: a systematic review of *Orientia* in vectors and hosts. *Parasit*  
612 *Vectors* 2019; **12**(1): 513.
- 613 12. Kelly DJ, Fuerst PA, Ching WM, Richards AL. Scrub typhus: the geographic  
614 distribution of phenotypic and genotypic variants of *Orientia tsutsugamushi*. *Clin*  
615 *Infect Dis* 2009; **48 Suppl 3**: S203-30.
- 616 13. Kim G, Ha NY, Min CK, et al. Diversification of *Orientia tsutsugamushi*  
617 genotypes by intragenic recombination and their potential expansion in endemic  
618 areas. *PLoS Negl Trop Dis* 2017; **11**(3): e0005408.
- 619 14. Arai S, Tabara K, Yamamoto N, et al. Molecular phylogenetic analysis of  
620 *Orientia tsutsugamushi* based on the groES and groEL genes. *Vector Borne*  
621 *Zoonotic Dis* 2013; **13**(11): 825-9.
- 622 15. Duong V, Blassdell K, May TT, et al. Diversity of *Orientia tsutsugamushi*  
623 clinical isolates in Cambodia reveals active selection and recombination process.  
624 *Infect Genet Evol* 2013; **15**: 25-34.
- 625 16. Phetsouvanh R, Sonthayanon P, Pukrittayakamee S, et al. The Diversity  
626 and Geographical Structure of *Orientia tsutsugamushi* Strains from Scrub Typhus  
627 Patients in Laos. *Plos Negl Trop Dis* 2015; **9**(8): e0004024.
- 628 17. Jiang J, Paris DH, Blacksell SD, et al. Diversity of the 47-kD HtrA nucleic  
629 acid and translated amino acid sequences from 17 recent human isolates of  
630 *Orientia*. *Vector Borne Zoonotic Dis* 2013; **13**(6): 367-75.
- 631 18. Sonthayanon P, Peacock SJ, Chierakul W, et al. High rates of homologous  
632 recombination in the mite endosymbiont and opportunistic human pathogen  
633 *Orientia tsutsugamushi*. *PLoS Negl Trop Dis* 2010; **4**(7): e752.
- 634 19. Batty EM, Chaemchuen S, Blacksell S, et al. Long-read whole genome  
635 sequencing and comparative analysis of six strains of the human pathogen  
636 *Orientia tsutsugamushi*. *PLoS Negl Trop Dis* 2018; **12**(6): e0006566.
- 637 20. Giengkam S, Blakes A, Utsahajit P, et al. Improved quantification,  
638 propagation, purification and storage of the obligate intracellular human  
639 pathogen *Orientia tsutsugamushi*. *PLoS Negl Trop Dis* 2015; **9**(8).
- 640 21. Blacksell SD, Robinson MT, Newton PN, Day NPJ. Laboratory-acquired  
641 scrub typhus and murine typhus infections: The argument for risk-based  
642 approach to biosafety requirements for *Orientia tsutsugamushi* and *Rickettsia*  
643 *typhi* laboratory activities. *Clin Infect Dis* 2018.
- 644 22. Sonthayanon P, Chierakul W, Wuthiekanun V, et al. Association of high  
645 *Orientia tsutsugamushi* DNA loads with disease of greater severity in adults with  
646 scrub typhus. *J Clin Microbiol* 2009; **47**(2): 430-4.
- 647 23. Linsuwanon P, Krairojananan P, Rodkvamtook W, Leepitakrat S, Davidson  
648 S, Wanja E. Surveillance for Scrub Typhus, Rickettsial Diseases, and Leptospirosis

- 649 in US and Multinational Military Training Exercise Cobra Gold Sites in Thailand.  
650 *US Army Med Dep J* 2018; (1-18): 29-39.
- 651 24. Darby AC, Cho NH, Fuxelius HH, Westberg J, Andersson SG. Intracellular  
652 pathogens go extreme: genome evolution in the Rickettsiales. *Trends Genet* 2007;  
653 **23**(10): 511-20.
- 654 25. Nakayama K, Kurokawa K, Fukuhara M, et al. Genome comparison and  
655 phylogenetic analysis of *Orientia tsutsugamushi* strains. *DNA Res* 2010; **17**(5):  
656 281-91.
- 657 26. Goodwin S, McPherson JD, McCombie WR. Coming of age: ten years of  
658 next-generation sequencing technologies. *Nat Rev Genet* 2016; **17**(6): 333-51.
- 659 27. Mertes F, Elsharawy A, Sauer S, et al. Targeted enrichment of genomic  
660 DNA regions for next-generation sequencing. *Brief Funct Genomics* 2011; **10**(6):  
661 374-86.
- 662 28. Summerer D. Enabling technologies of genomic-scale sequence  
663 enrichment for targeted high-throughput sequencing. *Genomics* 2009; **94**(6):  
664 363-8.
- 665 29. Wylie TN, Wylie KM, Herter BN, Storch GA. Enhanced virome sequencing  
666 using targeted sequence capture. *Genome Res* 2015; **25**(12): 1910-20.
- 667 30. O'Flaherty BM, Li Y, Tao Y, et al. Comprehensive viral enrichment enables  
668 sensitive respiratory virus genomic identification and analysis by next  
669 generation sequencing. *Genome Res* 2018; **28**(6): 869-77.
- 670 31. Bonsall D, Ansari MA, Ip C, et al. ve-SEQ: Robust, unbiased enrichment for  
671 streamlined detection and whole-genome sequencing of HCV and other highly  
672 diverse pathogens. *F1000Res* 2015; **4**: 1062.
- 673 32. Clark SA, Doyle R, Lucidarme J, Borrow R, Breuer J. Targeted DNA  
674 enrichment and whole genome sequencing of *Neisseria meningitidis* directly  
675 from clinical specimens. *Int J Med Microbiol* 2018; **308**(2): 256-62.
- 676 33. Herbreteau V, Jittapalapong S, Rerkamnuaychoke W, Chaval Y, Cosson JF,  
677 Morand S. Protocols for field and laboratory rodent studies. Bangkok, Thailand:  
678 Kasetsart University Press; 2011.
- 679 34. Sikes RS. The animal care and use committee of the American Society of  
680 Mammalogists. 2016 Guidelines of the American Society of Mammalogists for the  
681 use of wild mammals in research and education. *J Mammal* 2016; **97**(3): 663-88.
- 682 35. AVMA Panel on Euthanasia. AVMA Guidelines for the euthanasia of  
683 animals: American Veterinary Medical Association; 2013.
- 684 36. Gentry JW. Black plate collections of unengorged chiggers. *Singapore Med*  
685 *J* 1965; **1**(1): 46.
- 686 37. Uchikawa K, Kawamori F, Kawai S, Kumada N. Suzuki's method (Mitori-  
687 ho) a recommended method for the visual sampling of questing  
688 *Leptotrombidium scutellare* larvae in the field (Trombidiformes, Trombiculidae).  
689 *J Acarol Soc Jpn* 1993; **2**(2): 91-8.
- 690 38. Wangrangsimakul T, Greer RC, Chanta C, et al. Clinical Characteristics and  
691 Outcome of Children Hospitalized With Scrub Typhus in an Area of Endemicity. *J*  
692 *Pediatric Infect Dis Soc* 2020; **9**(2): 202-9.
- 693 39. Kumlert R, Chaisiri K, Anantatat T, et al. Autofluorescence microscopy for  
694 paired-matched morphological and molecular identification of individual chigger  
695 mites (Acari: Trombiculidae), the vectors of scrub typhus. *PLoS One* 2018; **13**(3):  
696 e0193163.

- 697 40. Nadchatram M, Dohany AL. A pictorial key to the subfamilies, genera and  
698 subgenera of Southeast Asian chiggers (Acari, Prostigmata, Trombiculidae).  
699 *Institute for Medical Research, Kuala Lumpur, Malaysia* 1974; **Bulletin number**  
700 **16**.
- 701 41. Vercammen-Grandjean PH. The chigger mites of the Far East. Special  
702 study. Washington D.C.: U.S. Army Medical Research and Development  
703 Command; 1968.
- 704 42. Stekolnikov AA. Leptotrombidium (Acari: Trombiculidae) of the World.  
705 *Zootaxa* 2013; **3728**(1): 1-173.
- 706 43. Jiang J, Chan TC, Temenak JJ, Dasch GA, Ching WM, Richards AL.  
707 Development of a quantitative real-time polymerase chain reaction assay specific  
708 for *Orientia tsutsugamushi*. *Am J Trop Med Hyg* 2004; **70**(4): 351-6.
- 709 44. Li H. Aligning sequence reads, clone sequences and assembly contigs with  
710 BWA-MEM. 2013. <https://arxiv.org/abs/1303.3997> (accessed 30/01/2018).
- 711 45. McKenna A, Hanna M, Banks E, et al. The Genome Analysis Toolkit: a  
712 MapReduce framework for analyzing next-generation DNA sequencing data.  
713 *Genome Res* 2010; **20**(9): 1297-303.
- 714 46. Seemann T. Snippy: fast bacterial variant calling from NGS reads. 2012.  
715 <https://github.com/tseemann/snippy>.
- 716 47. Nguyen LT, Schmidt HA, von Haeseler A, Minh BQ. IQ-TREE: a fast and  
717 effective stochastic algorithm for estimating maximum-likelihood phylogenies.  
718 *Mol Biol Evol* 2015; **32**(1): 268-74.
- 719 48. Kalyaanamoorthy S, Minh BQ, Wong TKF, von Haeseler A, Jermiin LS.  
720 ModelFinder: fast model selection for accurate phylogenetic estimates. *Nat*  
721 *Methods* 2017; **14**(6): 587-9.
- 722 49. Hoang DT, Chernomor O, von Haeseler A, Minh BQ, Vinh LS. UFBoot2:  
723 Improving the Ultrafast Bootstrap Approximation. *Mol Biol Evol* 2018; **35**(2):  
724 518-22.
- 725 50. Page AJ, Cummins CA, Hunt M, et al. Roary: rapid large-scale prokaryote  
726 pan genome analysis. *Bioinformatics* 2015; **31**(22): 3691-3.
- 727 51. Sievers F, Wilm A, Dineen D, et al. Fast, scalable generation of high-quality  
728 protein multiple sequence alignments using Clustal Omega. *Mol Syst Biol* 2011; **7**:  
729 539.
- 730 52. Dong X, Chaisiri K, Xia D, et al. Genomes of trombidid mites reveal novel  
731 predicted allergens and laterally-transferred genes associated with secondary  
732 metabolism. *Gigascience* 2018; **7**(12).
- 733 53. Takhampunya R, Korkusol A, Promsathaporn S, et al. Heterogeneity of  
734 *Orientia tsutsugamushi* genotypes in field-collected trombiculid mites from wild-  
735 caught small mammals in Thailand. *PLoS Negl Trop Dis* 2018; **12**(7): e0006632.
- 736 54. Takhampunya R, Tippayachai B, Korkusol A, et al. Transovarial  
737 Transmission of Co-Existing *Orientia tsutsugamushi* Genotypes in Laboratory-  
738 Reared *Leptotrombidium imphalum*. *Vector Borne Zoonotic Dis* 2016; **16**(1): 33-  
739 41.
- 740
- 741
- 742
- 743

744 **Figures**

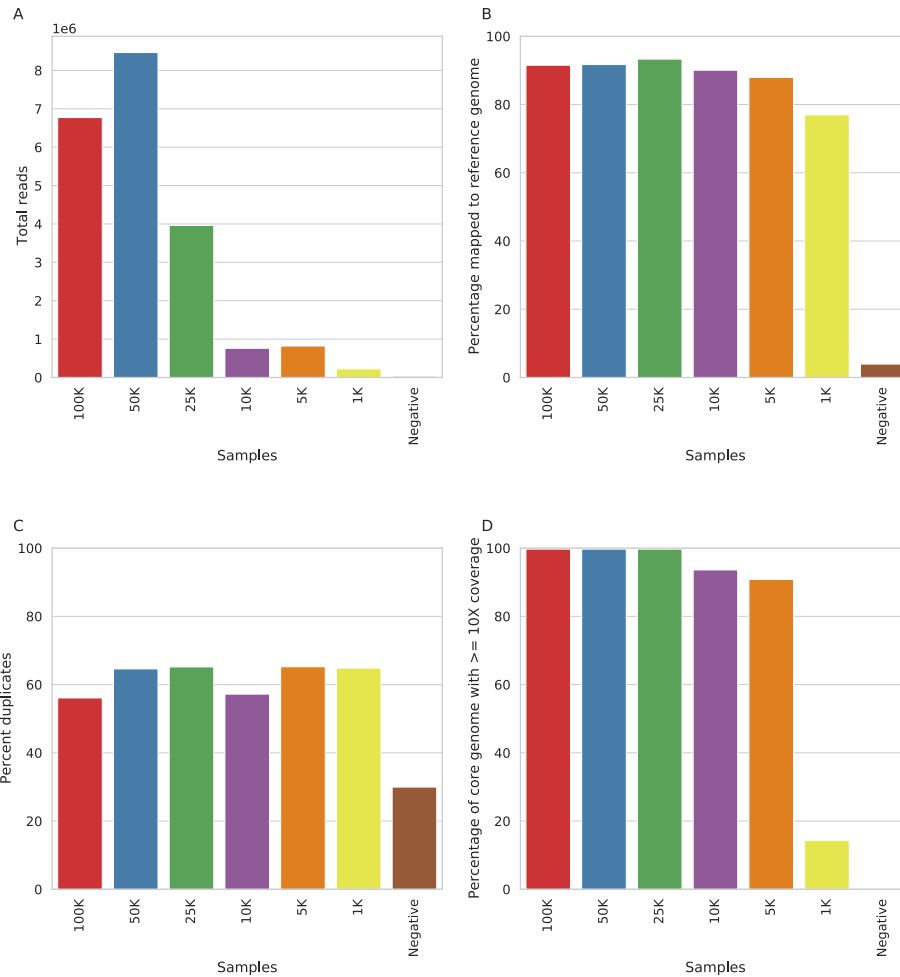

745

746 Figure 1. Results from sequencing of spike-in control samples showing a) total  
747 reads produced b) percentage of those reads which mapped to the reference  
748 genome c) percentage of the reads which were duplicates and d) the percentage  
749 of the core genome covered by 10 or more reads.  
750

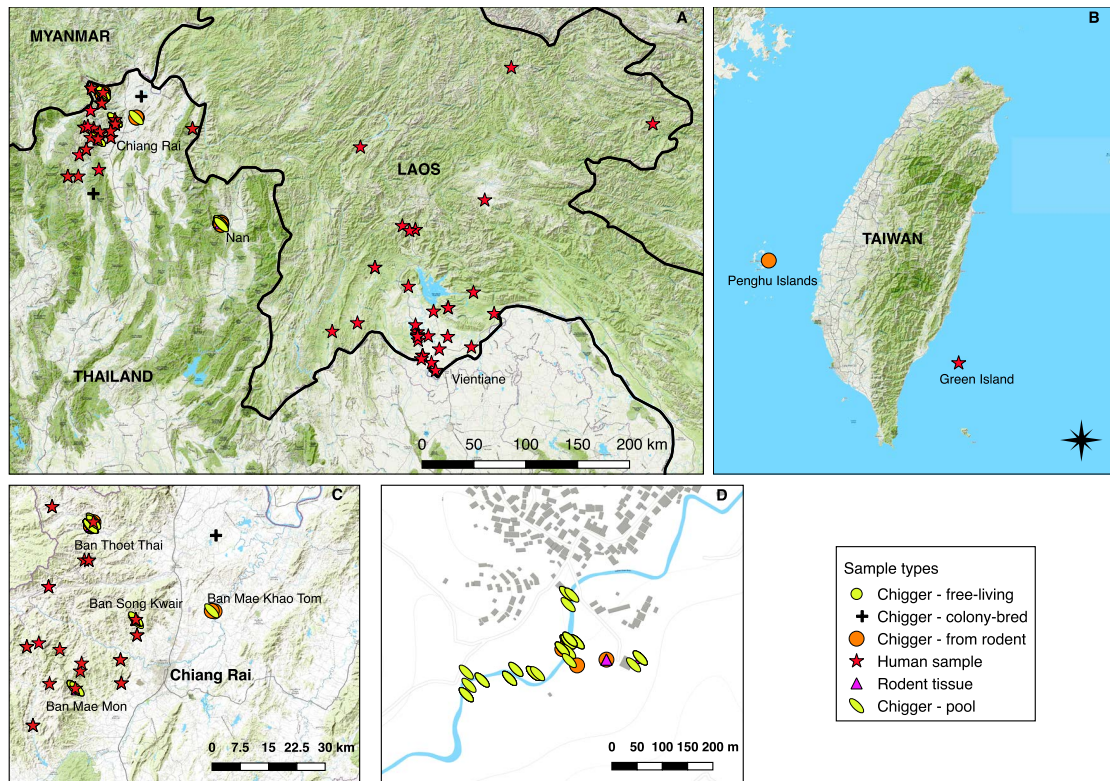

751  
752

753 Figure 2. Sample collection locations. A) Southeast Asia with locations in Laos  
754 and Northern Thailand, B) Taiwan, C) Chiang Rai Province, with key field sites  
755 named, D) Ban Thoet Thai, Chiang Rai Province, site of the greatest number of *O.*  
756 *tsustusgamushi* PCR positive chigger and rodent samples.

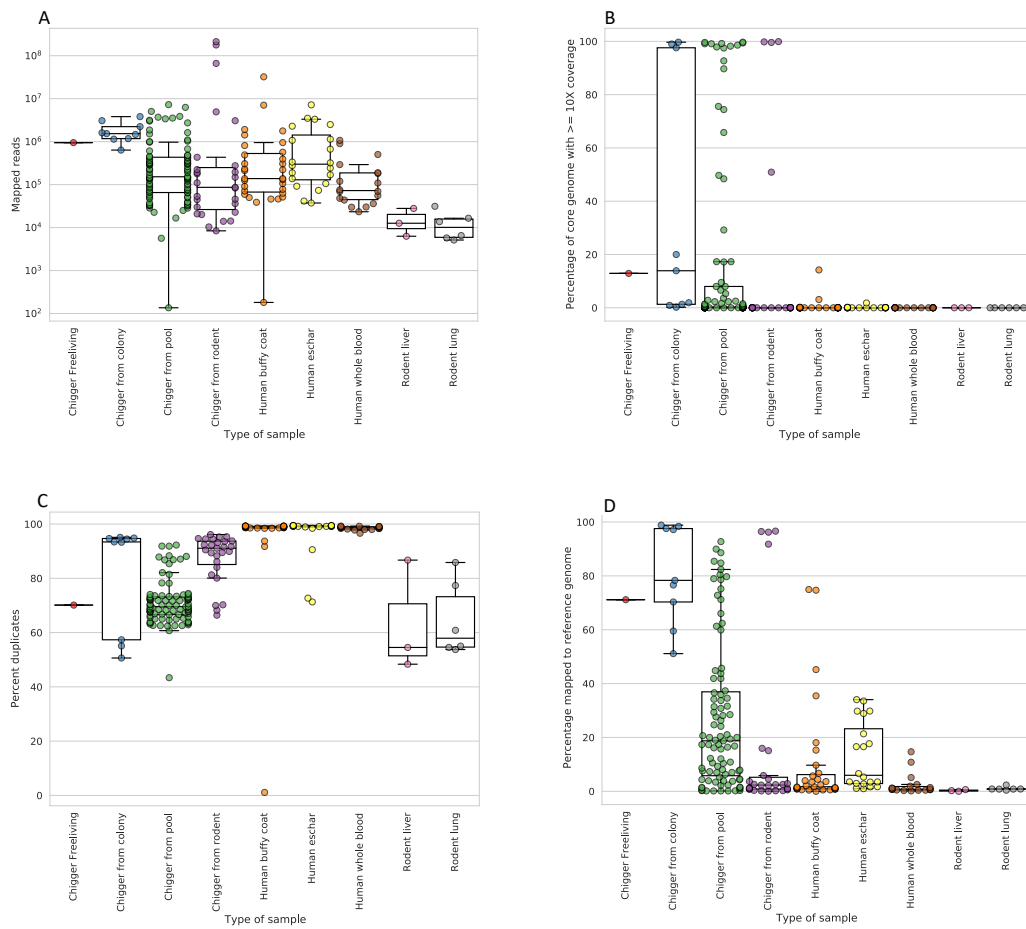

757

758

759 Figure 3. Sequencing statistics for human, chigger, and rodent samples. Panels  
760 show a) total number of reads and b) the percentage of reads which were  
761 mapped to the reference genome. Panel c) shows the sequence duplication rate  
762 and d) shows the coverage of the core genome.

763

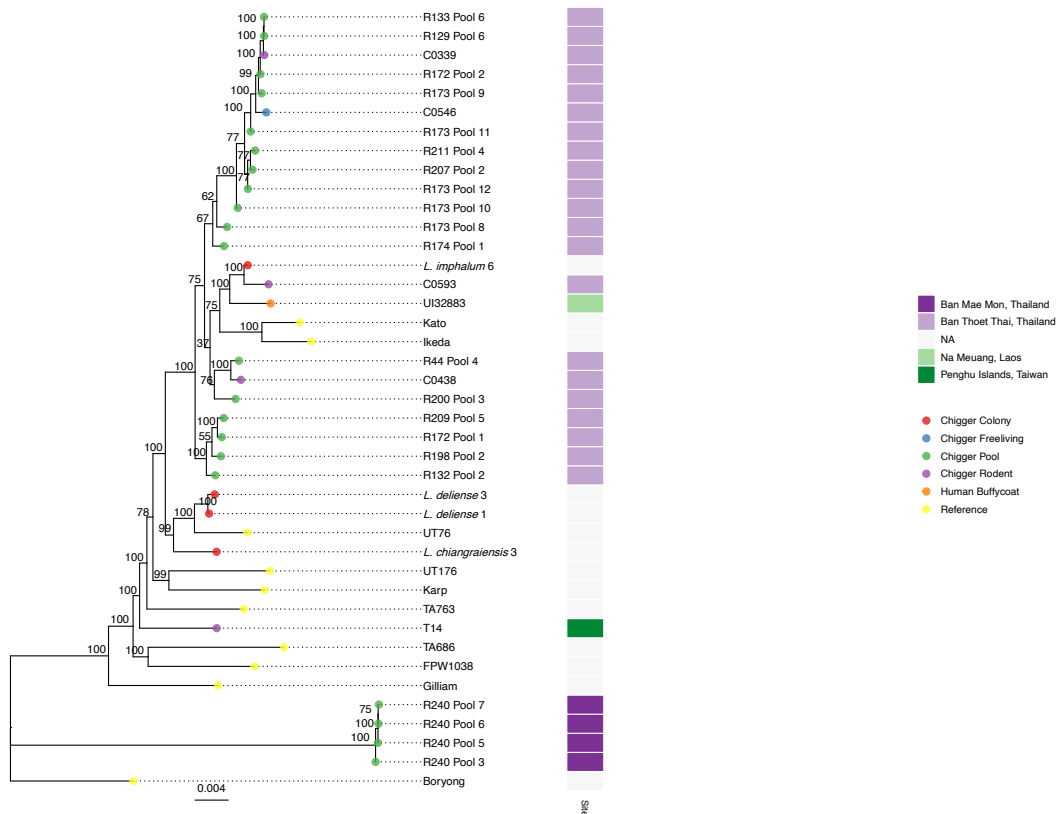

764  
765  
766  
767  
768

Figure 4: A maximum-likelihood phylogenetic tree produced using IQTREE from all samples that have >50kb of called positions. Tip colors represent the source of each sample, and the heatmap shows the site where samples were collected. The node labels show ultrafast bootstrap support values.
